# Supplementary material for: Digital multiplex ligation assay for highly multiplexed screening of β-lactamase-encoding genes in bacterial isolates
Source: PubMed Central journal article supplement (PMC7248093; doi:10.1038/s42003-020-0980-7), 2020-05-25
Supplement: 42003_2020_980_MOESM1_ESM.pdf [file 42003_2020_980_MOESM1_ESM.pdf]

**Supplementary Material:** Digital Multiplex Ligation Assay for Highly Multiplexed Screening of  $\beta$ -Lactamase-encoding Genes in Bacterial Isolates

**Supplementary Figure 1:** Barchart visualization of the molecular counts for each resistance gene type (y-axis) within each bacterial isolate (x-axis). Limits of detection for each resistance gene type are marked with grey horizontal lines. Colors indicate molecular counts above the detection limit – green if both replicates were above the detection limit and red if only one replicate was above the detection limit.

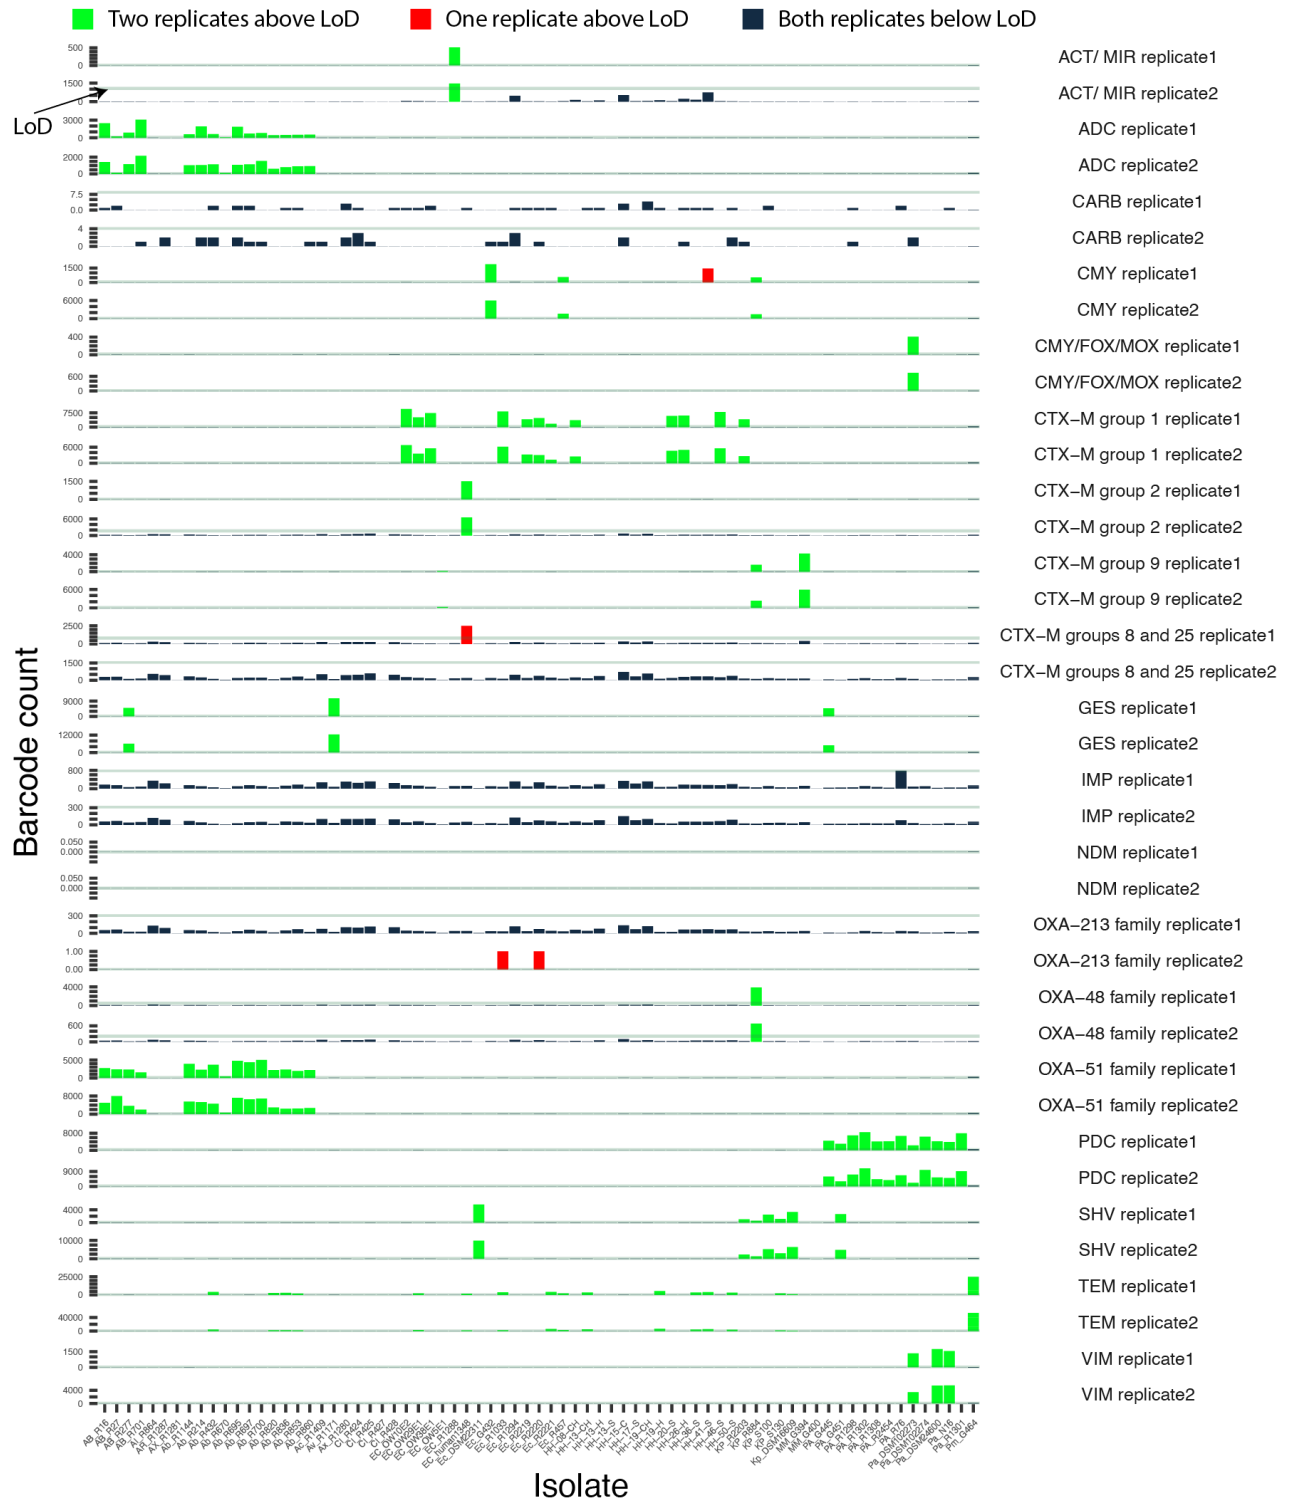

Supplementary Table 1: Probe pair sequences for the 18 clusters covered by the dMLA method, the genes targeted by each probe pair sequence, and associated enzyme family, enzyme class, and distinctive substrates. The sequences cover 1187 out of 1557 (76%) of the  $\beta$ -lactamase genes in the Lahey database. The included targets were chosen based on a combination of clinical relevance and the number of ESBL sequences they target.

| Cluster | No. of genes | Enzyme family       | Class | Genes targeted                                                                                                                                                                                                                                                               | Distinctive substrates                                              | Probe Set | Oligo Name  | Sequence(5'-3')                                     | Length (bp) | 5' Mod |
|---------|--------------|---------------------|-------|------------------------------------------------------------------------------------------------------------------------------------------------------------------------------------------------------------------------------------------------------------------------------|---------------------------------------------------------------------|-----------|-------------|-----------------------------------------------------|-------------|--------|
| 0       | 164          | TEM                 | A     | TEM-1-6/8/10-12/15-17/19-22/24/ 26/28-30/32/35/40/43/45/47-49/52-55/57/60-63/67/68/70-72/76-79/80-88/90-99/10/102/104/116/120-139/ 141-160/162-164/166-169/171/176-178/181-190/193/195/197/198/ 201/205-209-217/219/220/224                                                  | Penicillins, early cephalosporins, extended-spectrum cephalosporins | 0_A_L     | C0_1b_oh2_L | TGGGCCCAATTTTCCGTGACAATTAATCCCTTWTCCCTTYYTTGCG      | 48          |        |
|         |              |                     |       |                                                                                                                                                                                                                                                                              |                                                                     | 0_A_R     | C0_1b_oh2_R | GCWTTTTGCVTTCCTGTTTTNNNNNNNNNNGAATGAGTGTGCGTGCCTC   | 50          | Phos.  |
|         |              |                     |       |                                                                                                                                                                                                                                                                              |                                                                     | 0_B_L     | C0_3b_oh2_L | TGGGCCCAATTTTCCGTGACAATTAATTAAGCCCTCCCGTATCGTAK     | 48          |        |
|         |              |                     |       |                                                                                                                                                                                                                                                                              |                                                                     | 0_B_R     | C0_3b_oh2_R | TTATBTACAYGACGGKGRGTNNNNNNNNNNGAATGAGTGTGCGTGCCTC   | 50          | Phos.  |
| 1       | 159          | OXA (OXA-51 family) | D     | OXA-51/64-71/75-80/82-84/86-95/98-100/106-113/115/117/120-128/130-132/138/144/148-150/172-180/194-197/200-203/206/208/216/ 217/219/223/241/242/248/249/250/254/259-263/312-317/336-346/365/ 371/374-391/400-404/406-409/411-414/424-426/429-433/441/442/480/ 497/507-509/516 | Carbapenems                                                         | 1_A_L     | C1_2b_oh2_L | TGGGCCCAATTTTCCGTGACAATTAATTATCARGATTTASCTCGTCT     | 48          |        |
|         |              |                     |       |                                                                                                                                                                                                                                                                              |                                                                     | 1_A_R     | C1_2b_oh2_R | ATTGGRCCTTGARCTYATGCNNNNNNNNNNGAATGAGTGTGCGTGCCTC   | 50          | Phos.  |
|         |              |                     |       |                                                                                                                                                                                                                                                                              |                                                                     | 1_B_L     | C1_3b_oh2_L | TGGGCCCAATTTTCCGTGACAATTAATCCVACAAGTRGGYTGTTAA      | 48          |        |
|         |              |                     |       |                                                                                                                                                                                                                                                                              |                                                                     | 1_B_R     | C1_3b_oh2_R | CTGRATSGRTTGTMRGCCTNNNNNNNNNNGAATGAGTGTGCGTGCCTC    | 50          | Phos.  |
| 2       | 142          | SHV                 | A     | SHV-1/2/2A/3/5/7-9/11/13-16/18/24-29/30-38/40-46/48/49-52/55-57/59-67/69-82/85/86/89/92-111/119-121/128/129/132-135/137/ 141-165/168/172/173/178-180/182/ 183/185-191/193                                                                                                    | Penicillins, early cephalosporins, extended-spectrum cephalosporins | 2_A_L     | C2_2_oh2_L  | TGGGCCCAATTTTCCGTGACAATTAATGCCGYCATTACCRGAGCGA      | 48          |        |
|         |              |                     |       |                                                                                                                                                                                                                                                                              |                                                                     | 2_A_R     | C2_2_oh2_R  | TAACAGCGYCGCCAAATYGCNNNNNNNNNNGAATGAGTGTGCGTGCCTC   | 50          | Phos.  |
|         |              |                     |       |                                                                                                                                                                                                                                                                              |                                                                     | 2_B_L     | C2_3_oh2_L  | TGGGCCCAATTTTCCGTGACAATTAATCTGYCGGCGGCTGGTTAT       | 48          |        |
|         |              |                     |       |                                                                                                                                                                                                                                                                              |                                                                     | 2_B_R     | C2_3_oh2_R  | CGCCGATARGRCCGGAGCTRNNNNNNNNNNGAATGAGTGTGCGTGCCTC   | 50          | Phos.  |
| 3       | 124          | CMY                 | C     | CFE-1, CMY-2/4-7/12-18/20-51/53-58/60-90/93-97/99-119/121/122/124-135/138/139 and LAT-1/3                                                                                                                                                                                    | Cephalosporins (CMY-30/37/42 have extended-spectrum)                | 3_A_L     | C3_1b_oh2_L | TGGGCCCAATTTTCCGTGACAATTAATTAGTCACKCARCAWACKCTGT    | 48          |        |
|         |              |                     |       |                                                                                                                                                                                                                                                                              |                                                                     | 3_A_R     | C3_1b_oh2_R | TTGARITYTMGNTCCGGTYAGTNNNNNNNNNNGAATGAGTGTGCGTGCCTC | 50          | Phos.  |
|         |              |                     |       |                                                                                                                                                                                                                                                                              |                                                                     | 3_B_L     | C3_2b_oh2_L | TGGGCCCAATTTTCCGTGACAATTAATGCRCTAARMGWYTTTAYKCT     | 48          |        |
|         |              |                     |       |                                                                                                                                                                                                                                                                              |                                                                     | 3_B_R     | C3_2b_oh2_R | AACTCCAGCATTGGCTKTTNNNNNNNNNNGAATGAGTGTGCGTGCCTC    | 50          | Phos.  |
| 4       | 72           | PDC                 | C     | PDC-1-18/19a/19b/20/21a/21b/22-26/28/30-32/34-40/43-61/63-72/94-97                                                                                                                                                                                                           | Cephalosporins (PDC-1-5 have extended-spectrum)                     | 4_A_L     | C4_1_oh2_L  | TGGGCCCAATTTTCCGTGACAATTAATCCATCAGCCTGAAAGGARA      | 48          |        |
|         |              |                     |       |                                                                                                                                                                                                                                                                              |                                                                     | 4_A_R     | C4_1_oh2_R  | CCGCATTTACTCAGCTAGTNNNNNNNNNNGAATGAGTGTGCGTGCCTC    | 50          | Phos.  |
|         |              |                     |       |                                                                                                                                                                                                                                                                              |                                                                     | 4_B_L     | C4_2_oh2_L  | TGGGCCCAATTTTCCGTGACAATTAATTCARCCTGCTCGACCTCGCGA    | 48          |        |
|         |              |                     |       |                                                                                                                                                                                                                                                                              |                                                                     | 4_B_R     | C4_2_oh2_R  | CCATACCAGCCGCGGCTGNNNNNNNNNNGAATGAGTGTGCGTGCCTC     | 50          | Phos.  |
| 5       | 68           | CTX-M group 1       | A     | CTX-M-1/3/10/12/15/22/23/28-30/32-37/42/52-55/58/60-62/64/ 66/68-72/79/80/82/88/96/101/103/ 114/116/117/123/132/136/139/142/144/150/1 55-158/162-164/166/167/                                                                                                                | Extended-spectrum cephalosporins                                    | 5_A_L     | C5_1_oh2_L  | TGGGCCCAATTTTCCGTGACAATTAATTAGTTCACGCTSATGGCGACG    | 48          |        |
|         |              |                     |       |                                                                                                                                                                                                                                                                              |                                                                     | 5_A_R     | C5_1_oh2_R  | GCARCCGTCACGCTGTRTTNNNNNNNNNNGAATGAGTGTGCGTGCCTC    | 50          | Phos.  |
|         |              |                     |       |                                                                                                                                                                                                                                                                              |                                                                     | 5_B_L     | C5_3_oh2_L  | TGGGCCCAATTTTCCGTGACAATTAATCCACCAAYGATATCGCGGTG     | 48          |        |
|         |              |                     |       |                                                                                                                                                                                                                                                                              |                                                                     | 5_B_R     | C5_3_oh2_R  | ATYTGCCAAAGATCGTGCNNNNNNNNNNGAATGAGTGTGCGTGCCTC     | 50          | Phos.  |
| 6       | 54           | ADC                 | C     | ADC-1-7/10-23/25/26/30/38/39/41-44/50-54/56/58-64/67/68/73-81                                                                                                                                                                                                                | Cephalosporins, extended-spectrum cephalosporins                    | 6_A_L     | C6_1_oh2_L  | TGGGCCCAATTTTCCGTGACAATTAATTATRATGTRCCNGGTATGGC     | 48          |        |
|         |              |                     |       |                                                                                                                                                                                                                                                                              |                                                                     | 6_A_R     | C6_1_oh2_R  | YGTGGGBGYATTCCARAATANNNNNNNNNNGAATGAGTGTGCGTGCCTC   | 50          | Phos.  |
|         |              |                     |       |                                                                                                                                                                                                                                                                              |                                                                     | 6_B_L     | C6_2_oh2_L  | TGGGCCCAATTTTCCGTGACAATTAATTCAGARCARATYGTGATGAA     | 48          |        |
|         |              |                     |       |                                                                                                                                                                                                                                                                              |                                                                     | 6_B_R     | C6_2_oh2_R  | RCCTAATAAAGTGACYGCVANNNNNNNNNNGAATGAGTGTGCGTGCCTC   | 50          | Phos.  |
| 7       | 53           | ACT/ MIR            | C     | ACT-1-10/12-15/17-25/27-39 and MIR-1-18                                                                                                                                                                                                                                      | Cephalosporins                                                      | 7_A_L     | C7_2_oh2_L  | TGGGCCCAATTTTCCGTGACAATTAATTARCCCHCTYARNCTGRACCAT   | 48          |        |
|         |              |                     |       |                                                                                                                                                                                                                                                                              |                                                                     | 7_A_R     | C7_2_oh2_R  | ACHTGGATTAACGTCBCCSAANNNNNNNNNNGAATGAGTGTGCGTGCCTC  | 50          | Phos.  |
|         |              |                     |       |                                                                                                                                                                                                                                                                              |                                                                     | 7_B_L     | C7_3_oh2_L  | TGGGCCCAATTTTCCGTGACAATTAATTAAGMRBMRCATWCGCCWGG     | 48          |        |
|         |              |                     |       |                                                                                                                                                                                                                                                                              |                                                                     | 7_B_R     | C7_3_oh2_R  | GGVTAYGCGYAGBGTAARGCANNNNNNNNNNGAATGAGTGTGCGTGCCTC  | 50          | Phos.  |
| 8       | 53           | CTX-M group 9       | A     | CTX-M-9/13/14/16/17/19/21/24/27/ 38/46-51/64/65/67/73/81/83-87/90/ 93/98/ 99/102/104/105/110-113/ 121-123/125/126/129/130/132/ 134/137/147/148/159/161/168/174                                                                                                               | Extended-spectrum cephalosporins                                    | 8_A_L     | C8_2_oh2_L  | TGGGCCCAATTTTCCGTGACAATTAATTGRAGGCGTGACGGCTTTGCG    | 48          |        |
|         |              |                     |       |                                                                                                                                                                                                                                                                              |                                                                     | 8_A_R     | C8_2_oh2_R  | CCGCKMGATCGCGATGAGANNNNNNNNNNGAATGAGTGTGCGTGCCTC    | 50          | Phos.  |
|         |              |                     |       |                                                                                                                                                                                                                                                                              |                                                                     | 8_B_L     | C8_3_oh2_L  | TGGGCCCAATTTTCCGTGACAATTAATTCGTCTGGAATCGCACTGAABV   | 48          |        |
|         |              |                     |       |                                                                                                                                                                                                                                                                              |                                                                     | 8_B_R     | C8_3_oh2_R  | TACGCWGAATACCGCATTCCNNNNNNNNNNGAATGAGTGTGCGTGCCTC   | 50          | Phos.  |
| 9       | 52           | IMP                 | B     | IMP-1-35/37/38/40-45/48/49/51-56/58                                                                                                                                                                                                                                          | Carbapenems                                                         | 9_A_L     | C9_2b_oh2_L | TGGGCCCAATTTTCCGTGACAATTAATTTTTYCATRGYAYAGYDCRG     | 48          |        |
|         |              |                     |       |                                                                                                                                                                                                                                                                              |                                                                     | 9_A_R     | C9_2b_oh2_R | SNGGAAATWGRRTGGCTAAYNNNNNNNNNNGAATGAGTGTGCGTGCCTC   | 50          | Phos.  |
|         |              |                     |       |                                                                                                                                                                                                                                                                              |                                                                     | 9_B_L     | C9_3b_oh2_L | TGGGCCCAATTTTCCGTGACAATTAATGGAATWGRRTGGCTTAAATC     | 48          |        |
|         |              |                     |       |                                                                                                                                                                                                                                                                              |                                                                     | 9_B_R     | C9_3b_oh2_R | TCRRTCVATYYCMACRATGNNNNNNNNNNGAATGAGTGTGCGTGCCTC    | 50          | Phos.  |

| Cluster | No. of genes | Enzyme family              | Class | Genes targeted                                                                    | Distinctive substrates                                        | Probe Set | Oligo Name   | Sequence(5'-3')                                     | Length (bp) | 5' Mod |
|---------|--------------|----------------------------|-------|-----------------------------------------------------------------------------------|---------------------------------------------------------------|-----------|--------------|-----------------------------------------------------|-------------|--------|
| 10      | 48           | VIM                        | B     | VIM-1-20/23/47/49-51                                                              | Carbapenems                                                   | 10_A_L    | C10_1_oh2_L  | TGGGCCCAATTTCCGTGACAATTAATTCGAARAACACRGYRGCMTT      | 48          |        |
|         |              |                            |       |                                                                                   |                                                               | 10_A_R    | C10_1_oh2_R  | CTCGCGGAGATTGARAAGCANNNNNNNNNNGAATGAGTGTGCGTGCACTC  | 50          | Phos.  |
|         |              |                            |       |                                                                                   |                                                               | 10_B_L    | C10_2_oh2_L  | TGGGCCCAATTTCCGTGACAATTAATTCGCACTTYCATGACGAYCGM     | 48          |        |
|         |              |                            |       |                                                                                   |                                                               | 10_B_R    | C10_2_oh2_R  | GTCCGGYGGMGTGATGYCCTNNNNNNNNNNGAATGAGTGTGCGTGCACTC  | 50          | Phos.  |
| 12      | 38           | OXA (OXA-213 family)       | D     | OXA-213/267-273/304/305/322-332/348-354/357-359/417/421/500-503/506               | Carbapenems                                                   | 12_A_L    | C12_2b_oh2_L | TGGGCCCAATTTCCGTGACAATTAATTAYGGHCARAARCGYTRTTT      | 48          |        |
|         |              |                            |       |                                                                                   |                                                               | 12_A_R    | C12_2b_oh2_R | CCYGAYTGGRAAAARGAYATNNNNNNNNNNGAATGAGTGTGCGTGCACTC  | 50          | Phos.  |
|         |              |                            |       |                                                                                   |                                                               | 12_B_L    | C12_5b_oh2_L | TGGGCCCAATTTCCGTGACAATTAATTTWACVGGYTGRRNRTTCAA      | 48          |        |
|         |              |                            |       |                                                                                   |                                                               | 12_B_R    | C12_5b_oh2_R | YMDCARGGARAATTRTHGCNNNNNNNNNNGAATGAGTGTGCGTGCACTC   | 50          | Phos.  |
| 13      | 30           | GES                        | A     | GES-1-22/24-31                                                                    | Cephalosporins, extended-spectrum cephalosporins, carbapenems | 13_A_L    | C13_1_oh2_L  | TGGGCCCAATTTCCGTGACAATTAATTAGCAGCTSAGATCGGTGTTG     | 48          |        |
|         |              |                            |       |                                                                                   |                                                               | 13_A_R    | C13_1_oh2_R  | CGATCGTCGATCCCAAGGANNNNNNNNNNGAATGAGTGTGCGTGCACTC   | 50          | Phos.  |
|         |              |                            |       |                                                                                   |                                                               | 13_B_L    | C13_3_oh2_L  | TGGGCCCAATTTCCGTGACAATTAATTCCTCTGTCCGGTCAAGTTAT     | 48          |        |
|         |              |                            |       |                                                                                   |                                                               | 13_B_R    | C13_3_oh2_R  | TACACAACATCCTGAGCANNNNNNNNNNGAATGAGTGTGCGTGCACTC    | 50          | Phos.  |
| 14      | 30           | CMY/FOX/MOX                | C     | CMY-1/8/8b/9-11/19, FOX-1-10/12/13 and MOX-1-12                                   | Cephalosporins (CMY-8/9 have extended-spectrum)               | 14_A_L    | C14_2_oh2_L  | TGGGCCCAATTTCCGTGACAATTAATGTGCARYGACGACSCGTGTT      | 48          |        |
|         |              |                            |       |                                                                                   |                                                               | 14_A_R    | C14_2_oh2_R  | CGAKATWGGVTCSTGTSAGCANNNNNNNNNNGAATGAGTGTGCGTGCACTC | 50          | Phos.  |
|         |              |                            |       |                                                                                   |                                                               | 14_B_L    | C14_3_oh2_L  | TGGGCCCAATTTCCGTGACAATTAATGATVGCRTCGTCATGCTGG       | 48          |        |
|         |              |                            |       |                                                                                   |                                                               | 14_B_R    | C14_3_oh2_R  | CCAAAYCGCACTMYCCYAWCNNNNNNNNNNGAATGAGTGTGCGTGCACTC  | 50          | Phos.  |
| 15      | 27           | CARB                       | A     | CARB-17-20/22/24-36/38/40/41/43-48                                                | Carbencillin                                                  | 15_A_L    | C15_1_oh2_L  | TGGGCCCAATTTCCGTGACAATTAATTAAAGTTATTCTGTTGGYTG      | 48          |        |
|         |              |                            |       |                                                                                   |                                                               | 15_A_R    | C15_1_oh2_R  | GCTGATGGTTRTCTCAACTGNNNNNNNNNNGAATGAGTGTGCGTGCACTC  | 50          | Phos.  |
|         |              |                            |       |                                                                                   |                                                               | 15_B_L    | C15_2_oh2_L  | TGGGCCCAATTTCCGTGACAATTAATTACCATGCTAAGCGAYATGGA     | 48          |        |
|         |              |                            |       |                                                                                   |                                                               | 15_B_R    | C15_2_oh2_R  | BAGCGGCAAACTCAACAAAANNNNNNNNNNGAATGAGTGTGCGTGCACTC  | 50          | Phos.  |
| 18      | 22           | CTX-M group 2              | A     | CTX-M-2/4-7/20/21/35/43/44/56/59/76/77/92/95/97/115/124/131/141/165               | Extended-spectrum cephalosporins                              | 18_A_L    | C26_18L      | TGGGCCCAATTTCCGTGACAATTAATTCAATGTTAACGGTGTGGCG      | 48          |        |
|         |              |                            |       |                                                                                   |                                                               | 18_A_R    | C26_18R      | ACGCTACCCCTGCTATTTAGNNNNNNNNNNGAATGAGTGTGCGTGCACTC  | 50          | Phos.  |
|         |              |                            |       |                                                                                   |                                                               | 18_B_L    | C105_18L     | TGGGCCCAATTTCCGTGACAATTAATTGCAGCTGRAAGCCCTGGAGA     | 48          |        |
|         |              |                            |       |                                                                                   |                                                               | 18_B_R    | C105_18R     | AAAGTTCGGGAGGTCGGCTTNNNNNNNNNNGAATGAGTGTGCGTGCACTC  | 50          | Phos.  |
| 20      | 20           | OXA (OXA-48 family)        | D     | OXA-48/54/162/163/181/199/204/232/244/245/247/252/370/405/416/436/438/439/484/505 | Carbapenems                                                   | 20_A_L    | C1_20L       | TGGGCCCAATTTCCGTGACAATTAATTATGCGTYRTTAGCCTTATC      | 48          |        |
|         |              |                            |       |                                                                                   |                                                               | 20_A_R    | C1_20R       | GRCTGTRTTDDTGGTGRCANNNNNNNNNNGAATGAGTGTGCGTGCACTC   | 50          | Phos.  |
|         |              |                            |       |                                                                                   |                                                               | 20_B_L    | C146_20L     | TGGGCCCAATTTCCGTGACAATTAATTAGAAYAMRCAGCARGGWTTT     | 48          |        |
|         |              |                            |       |                                                                                   |                                                               | 20_B_R    | C146_20R     | ACCAAYRATCTTAARCGGGCNNNNNNNNNNGAATGAGTGTGCGTGCACTC  | 50          | Phos.  |
| 27      | 14           | CTX-M group 8 and group 25 | A     | CTX-M-8/25/26/39-41/63/78/89/91/94/100/152/160                                    | Extended-spectrum cephalosporins                              | 27_A_L    | C393_27L     | TGGGCCCAATTTCCGTGACAATTAATTGTACAGCGAYAATAACKGCCA    | 48          |        |
|         |              |                            |       |                                                                                   |                                                               | 27_A_R    | C393_27R     | TGAAYAAGCTGATTGCCCATNNNNNNNNNNGAATGAGTGTGCGTGCACTC  | 50          | Phos.  |
|         |              |                            |       |                                                                                   |                                                               | 27_B_L    | C584_27L     | TGGGCCCAATTTCCGTGACAATTAATTATCTSACRTTGGGCARTGCC     | 48          |        |
|         |              |                            |       |                                                                                   |                                                               | 27_B_R    | C584_27R     | YTRGGTGAMACTCAGCGTGCNNNNNNNNNNGAATGAGTGTGCGTGCACTC  | 50          | Phos.  |
